# Supplementary material for: Structural and mechanistic insights into low-temperature CO oxidation over a prototypical high entropy oxide by Cu L-edge operando soft X-ray absorption spectroscopy
Source: Royal Society of Chemistry journal article supplement (doi:10.1039/d1cp03946f), 2021-01-01
Supplement: d1cp03946f1.pdf [file d1cp03946f1.pdf]

## Supporting Information

Structural and mechanistic insights into  
low-temperature CO oxidation over a  
prototypical high entropy oxide by Cu L-edge  
operando soft X-ray Absorption Spectroscopy

F. Tavani<sup>a</sup>, M. Fracchia<sup>b</sup>, Alessandro Tofoni<sup>a</sup>, L. Braglia<sup>c</sup>, A. Jouve<sup>d</sup>,  
S. Morandi<sup>e</sup>, M. Manzoli<sup>d</sup>, P. Torelli<sup>c</sup>, P. Ghigna<sup>b</sup>, P. D'Angelo<sup>a,\*</sup>

<sup>a</sup>Dipartimento di Chimica, Università di Roma "La Sapienza",  
P.le A. Moro 5, 00185 Roma, Italy.

<sup>b</sup>Dipartimento di Chimica, Università di Pavia,  
Via Taramelli 16, 27100 Pavia, Italy.

<sup>c</sup>CNR - Istituto Officina dei Materiali, TASC, I-34149 Trieste, Italy.

<sup>d</sup>Dipartimento di Scienza e Tecnologia del Farmaco,  
Università di Torino, Via P. Giuria 9, 10125, Torino, Italy.

<sup>e</sup>Dipartimento di Chimica, Università di Torino,  
Via P. Giuria 7, 10125 Torino, Italy.

\* p.dangelo@uniroma1.it

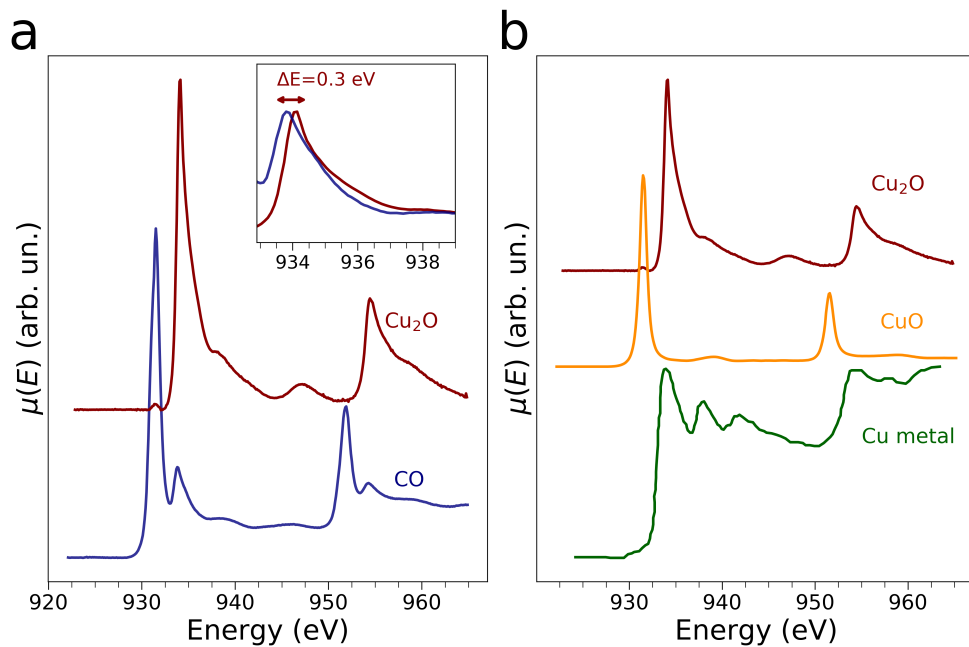

Figure S1: (a) Cu L<sub>2,3</sub>-edge XAS spectra of Cu<sub>2</sub>O in He at room temperature (dark red line) and of the Mg<sub>0.2</sub>Co<sub>0.2</sub>Ni<sub>0.2</sub>Cu<sub>0.2</sub>Zn<sub>0.2</sub>O HEO upon exposure to CO flux at 235 °C for 50 minutes (blue line). The inset compares the Cu(I) L<sub>3</sub>-edge peaks present in the Cu L<sub>2,3</sub>-edge spectra. (b) Cu L<sub>2,3</sub>-edge XAS spectra of Cu<sub>2</sub>O (dark red line), CuO (yellow line) and metallic Cu (green line), where all spectra are measured in He at room temperature. The Cu L<sub>2,3</sub>-edge spectra of the Cu<sub>2</sub>O, CuO and metallic Cu standards were aligned to the HEO spectra using the L<sub>3</sub>-edge of CuO as a reference.

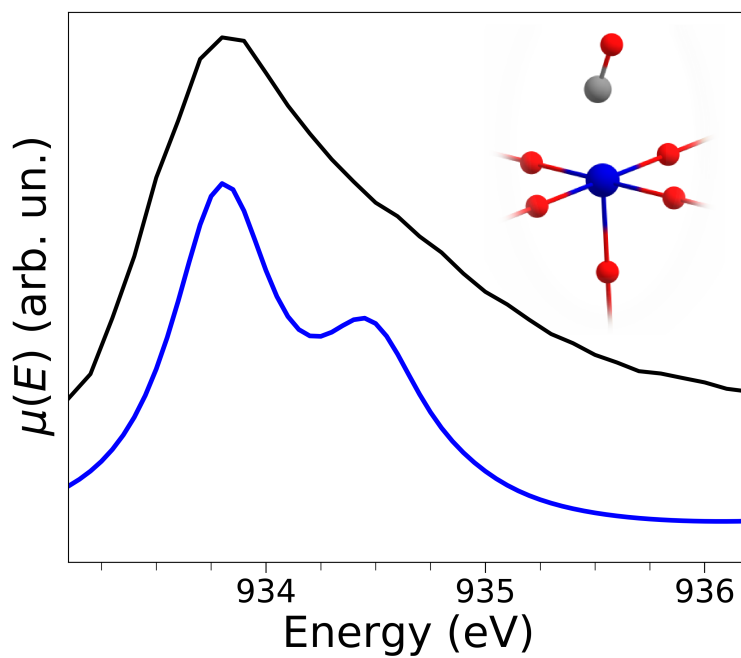

Figure S2: Comparison between the Cu(I) Cu L<sub>3</sub>-edge feature measured upon exposure of the HEO surface to CO (50 minutes, 235 °C) and the theoretical Cu L<sub>3</sub>-edge spectrum best reproducing the experimental curve (blue) and associated to the global minimum of the residual function  $\Delta$ . The associated molecular cluster is also shown, with  $d = 2.1 \text{ \AA}$ ,  $\theta = 20^\circ$  and  $\phi = 20^\circ$ , where the Cu(I) cation, the oxygen and carbon atoms are depicted in blue, red and gray, respectively.

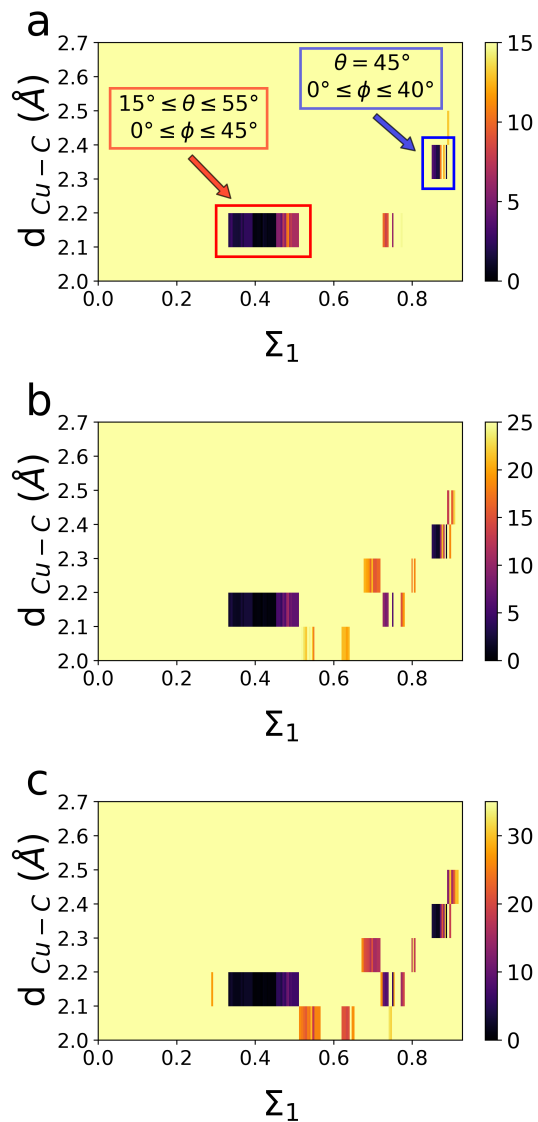

Figure S3: Distribution of the theoretical Cu L<sub>3</sub>-edge spectra of the clusters modeling the interaction between the HEO surface and CO as a function of the distance between the Cu(I) cation and the CO carbon atom ( $d_{Cu-C}$ ) and of  $\Sigma_1$ . The values of  $\Delta$  within 15%, 25% and 35% of the global minimum of  $\Delta$  are shown in panels a, b and c, respectively.

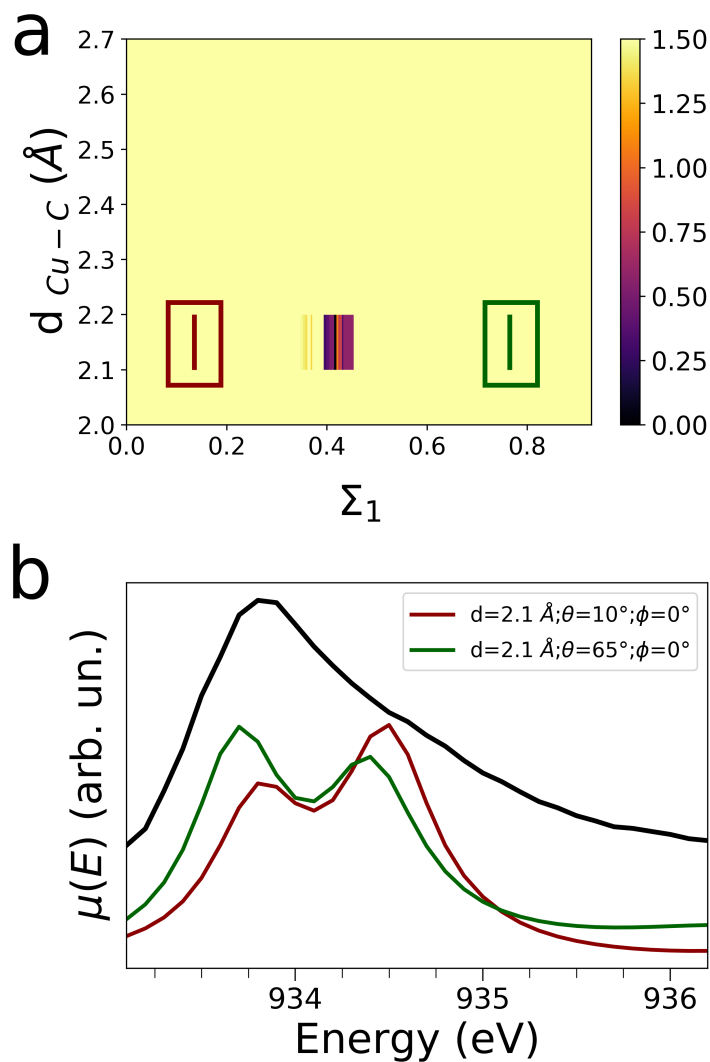

Figure S4: (a) Distribution of the theoretical Cu L<sub>3</sub>-edge spectra of the clusters modeling the interaction between the HEO surface and CO as a function of the distance between the Cu(I) cation and the CO carbon atom ( $d_{Cu-C}$ ) and of  $\Sigma_1$ . The values of  $\Delta$  within 1.5% of the global minimum of  $\Delta$  are shown on the color scale, while two ulterior selected spectral regions are evidenced in green and dark red lines, respectively. (b) Theoretical Cu L<sub>3</sub>-edge spectra of two selected CO adsorption geometries (green and dark red lines) compared to the experimental curve (black line). The values of  $\Delta$  associated to each theoretical spectrum are highlighted in panel a with the same green and dark red colors.
